# Supplementary material for: Nuclear magnetic resonance enables understanding of polydiallyldimethylammonium chloride composition and N-nitrosodimethylamine formation during chloramination
Source: Royal Society of Chemistry journal article supplement (doi:10.1039/d1ew00091h), 2021-01-01
Supplement: d1ew00091h1.pdf [file d1ew00091h1.pdf]

### Supplementary Information

#### Nuclear Magnetic Resonance Enables Understanding of PolyDiallyldimethyl Ammonium Chloride

#### Composition and N-Nitrosodimethylamine Formation During Chloramination

Samantha Donovan <sup>a</sup>, Ariel J Atkinson <sup>b</sup>, Natalia Fischer <sup>b</sup>, Amelia E Taylor<sup>c</sup>, Johann Kieffer<sup>d</sup>, JP Croue<sup>e</sup>, Paul Westerhoff <sup>b</sup>, Pierre Herckes <sup>a</sup>

<sup>a</sup>School of Molecular Sciences, Arizona State University, Tempe, Arizona, USA

<sup>b</sup>School of Sustainable Engineering and the Built Environment, Arizona State University, Tempe, Arizona, USA

In preparation for: Environmental Science: Water Research and Technology

Figure S1 shows the  $^1\text{H}$ -NMR spectra of three additional commercially available polyDADMAC solutions. The commercial polymer solutions were characterized via  $^1\text{H}$ -NMR, confirming that they have the same general structure, and smaller oligomers can also be seen.

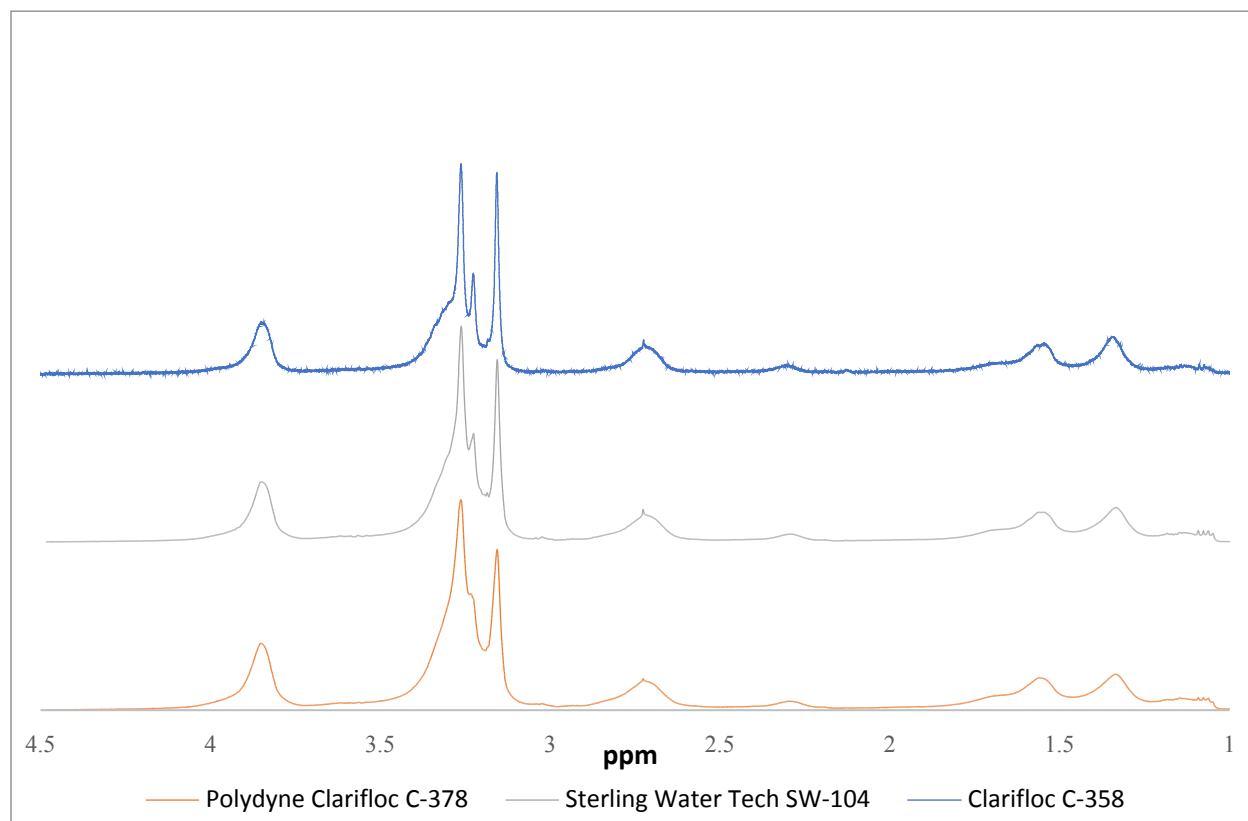

**Figure S11:**  $^1\text{H}$ -NMR spectra of three commercial polyDADMAC solutions.

Figure S12 shows the reference  $^1\text{H}$ -NMR spectra for these impurity and precursor low molecular weight compounds. The spectra reveal that the peaks at 2.73 ppm correspond to DMA while the peaks at 1-1.20 ppm are indicative of oligomers. ADMA and DADMAC were not readily observed in the spectra.

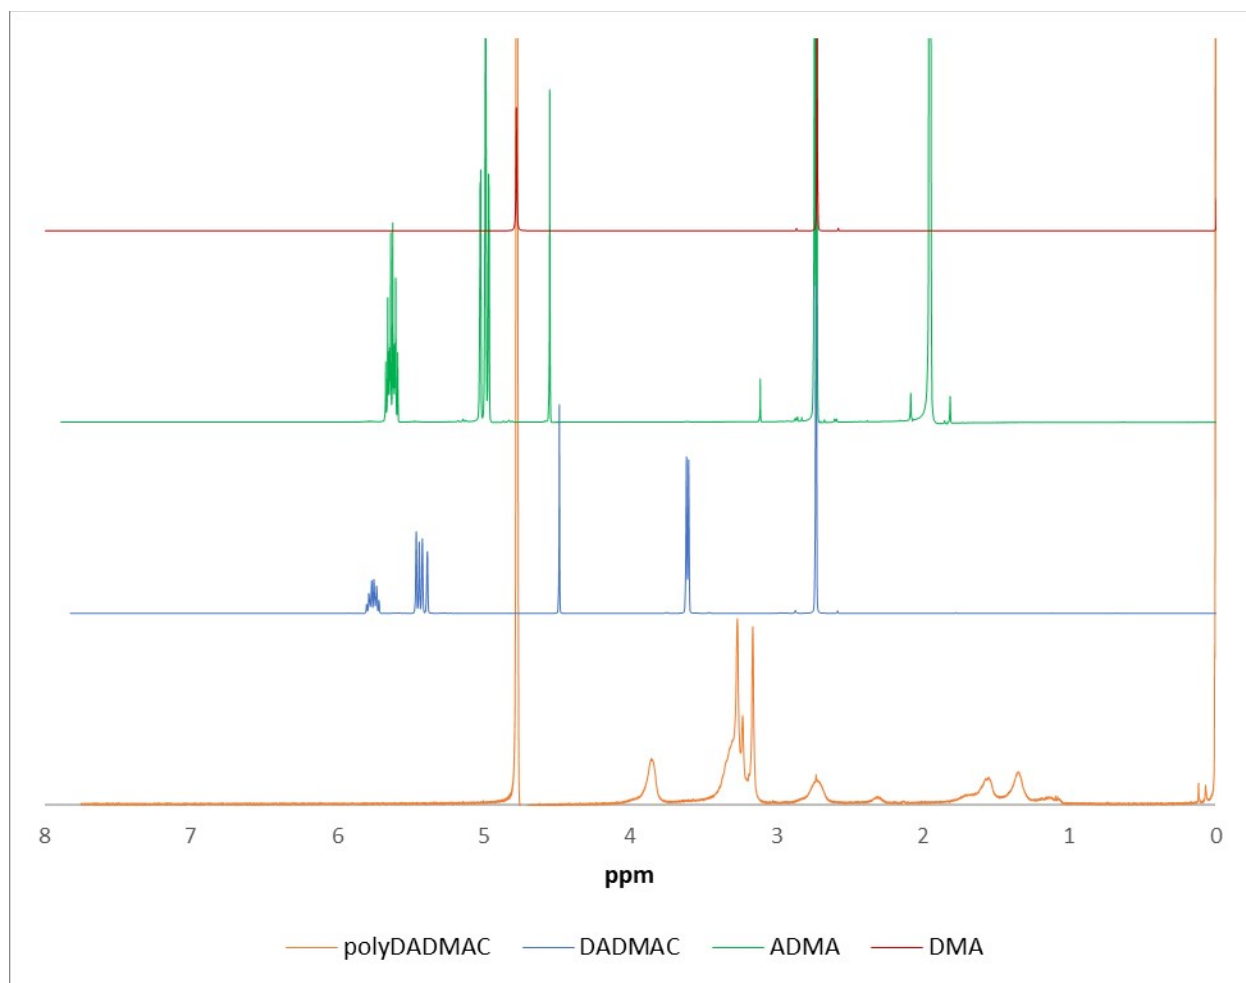

**Figure SI 2:** <sup>1</sup>H-NMR spectra of a commercial polyDADMAC solution, DADMAC, ADMA, and DMA.
